# Supplementary material
Source: publisher figshare collection journal article supplement (https://frontiersin.figshare.com/ndownloader/files/31177411)
Supplement: Supplementary file [file 31177411]

### Supplementary Table 1.

Mosaicism for GRC copy number in oocytes of great tits

| <b>Specimen ID</b> | <b>Number of cells examined</b> | <b>Number of cells with one GRC</b> | <b>Number of cells with two GRC</b> |
|--------------------|---------------------------------|-------------------------------------|-------------------------------------|
| 1                  | 65                              | 0                                   | 65                                  |
| 2                  | 88                              | 0                                   | 88                                  |
| 3                  | 89                              | 0                                   | 89                                  |
| 4                  | 50                              | 1                                   | 49                                  |
| 5                  | 54                              | 6                                   | 48                                  |
| 6                  | 27                              | 7                                   | 20                                  |
| 7                  | 93                              | 9                                   | 84                                  |
| Total              | 424                             | 13                                  | 411                                 |
